# Supplementary material for: An Improved Anticancer Drug-Response Prediction Based on an Ensemble Method Integrating Matrix Completion and Ridge Regression
Source: PubMed Central journal article supplement — Mol Ther Nucleic Acids. 2020 Jul 10;21:676–86. doi: 10.1016/j.omtn.2020.07.003 (PMC7403773; doi:10.1016/j.omtn.2020.07.003), 2020-07-10
Supplement: mmc1.pdf [file mmc1.pdf]

OMTN, Volume 21

## **Supplemental Information**

### **An Improved Anticancer Drug-Response Prediction Based on an Ensemble Method Integrating Matrix Completion and Ridge Regression**

**Chuanying Liu, Dong Wei, Ju Xiang, Fuquan Ren, Li Huang, Jidong Lang, Geng Tian, Yushuang Li, and Jialiang Yang**

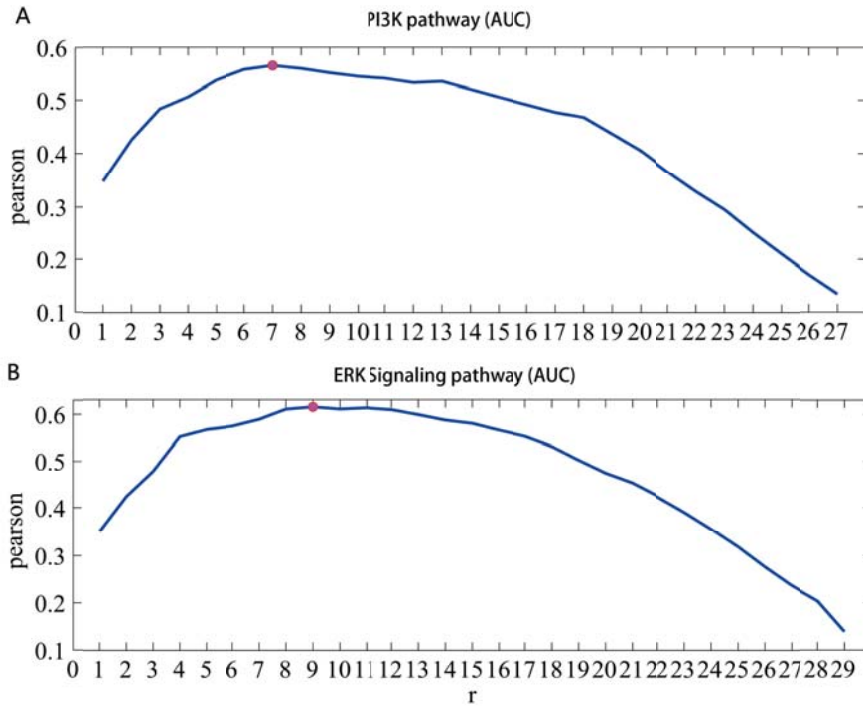

**S1 Figure. The parameter  $r$  optimization for MC model in two datasets.** The horizontal axis denotes the rank number, and the vertical axis denotes the Pearson correlation between predicted and observed response values. (A)  $r$  optimization in PI3K. (B)  $r$  optimization in ERK.

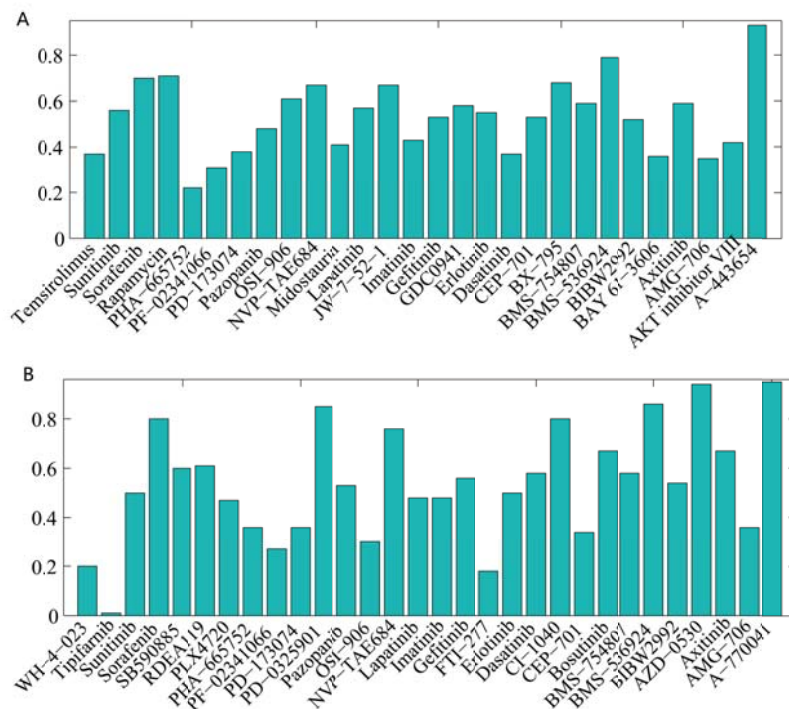

**S2 Figure. The weight parameter  $\beta_k$  optimization for the combination model in two datasets.** (A)  $\beta_k$  optimization in PI3K. (B)  $\beta_k$  optimization in ERK.

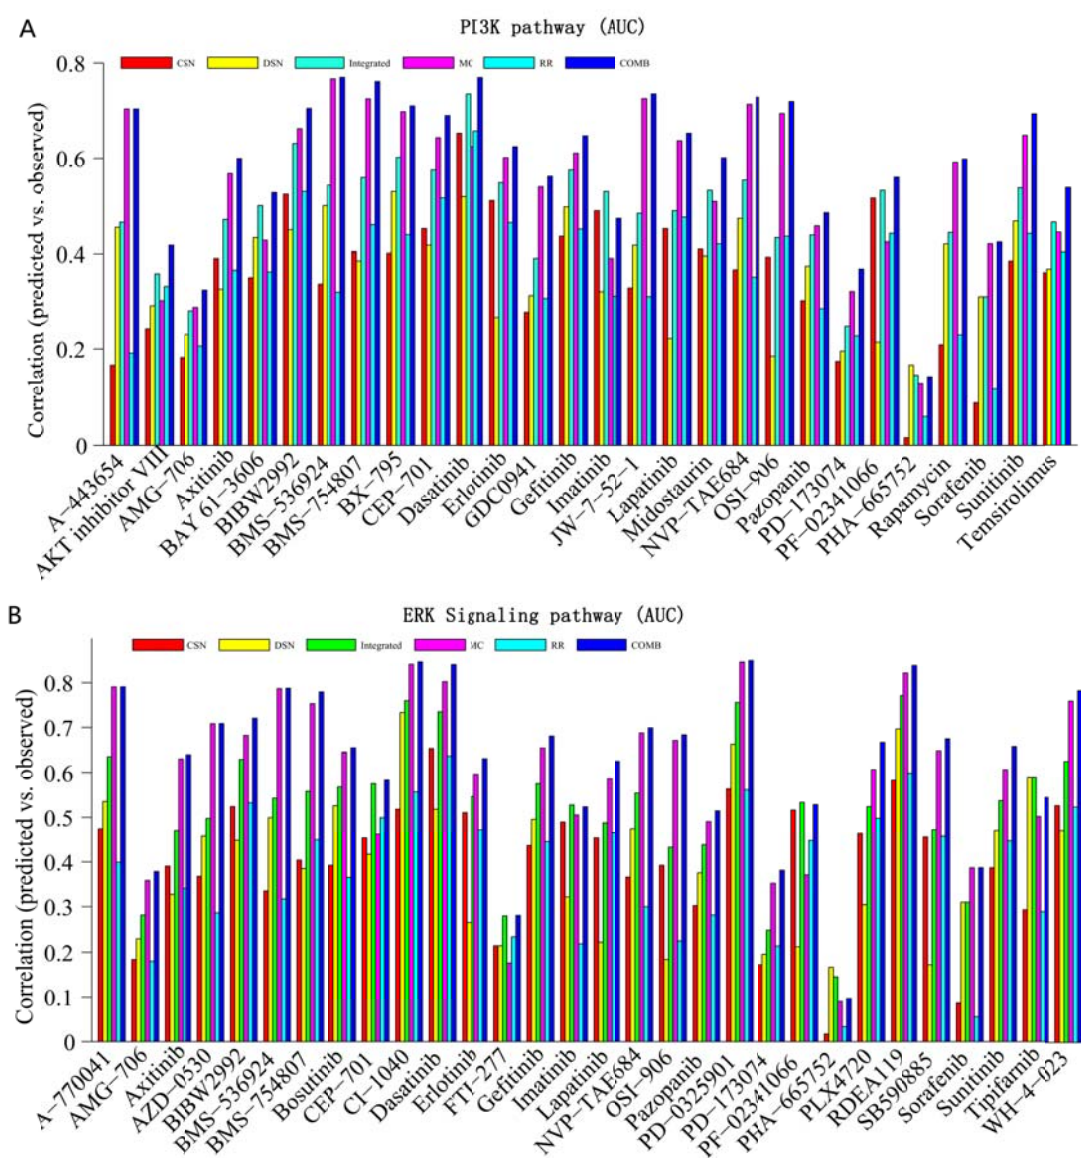

**S3 Figure. Prediction performance comparison of six different models based on Pearson correlations between the predicted and observed response values. (A) Bar graph for 28 drugs in PI3K. (B) Bar graph for 30 drugs in ERK.**

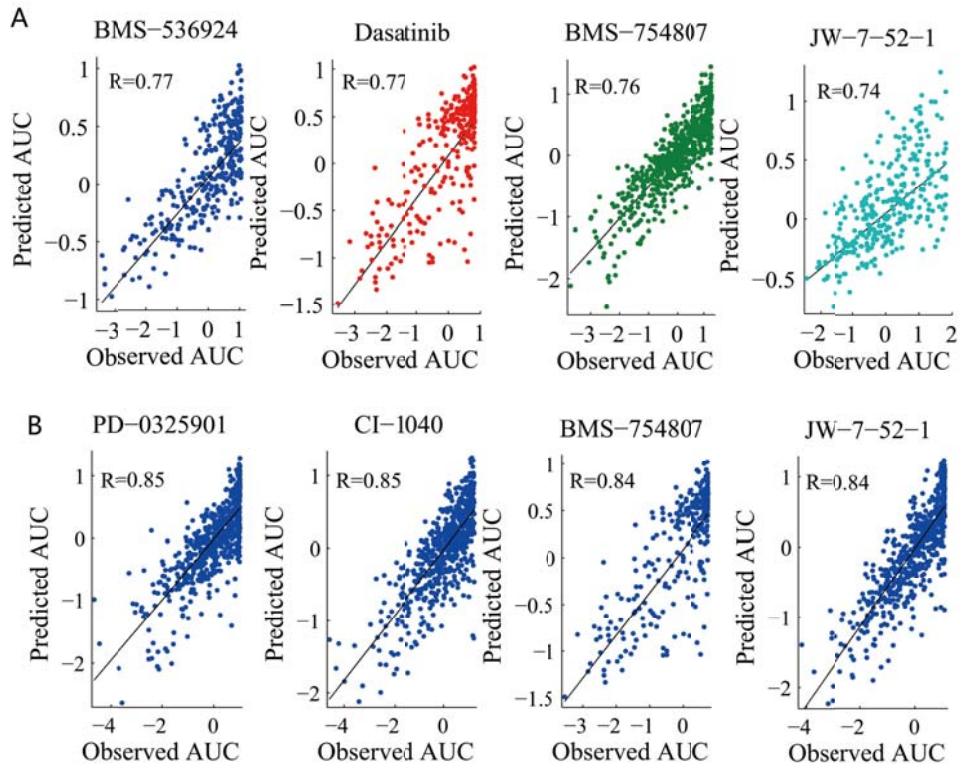

**S4 Figure. Scatter plots of observed and predicted drug responses using the combination model. (A) Scatter plots for four example drugs in PI3K. (B) Scatter plots for four example drugs in ERK.**

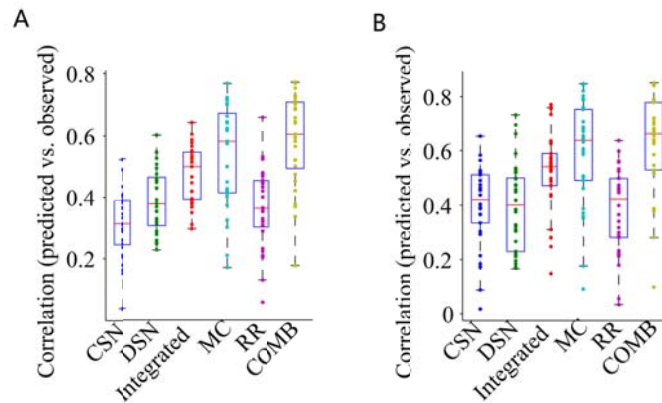

**S5 Figure. The correlation distribution comparisons of six different models in two datasets. (A) Boxplot in PI3K. (B) Boxplot in ERK.**

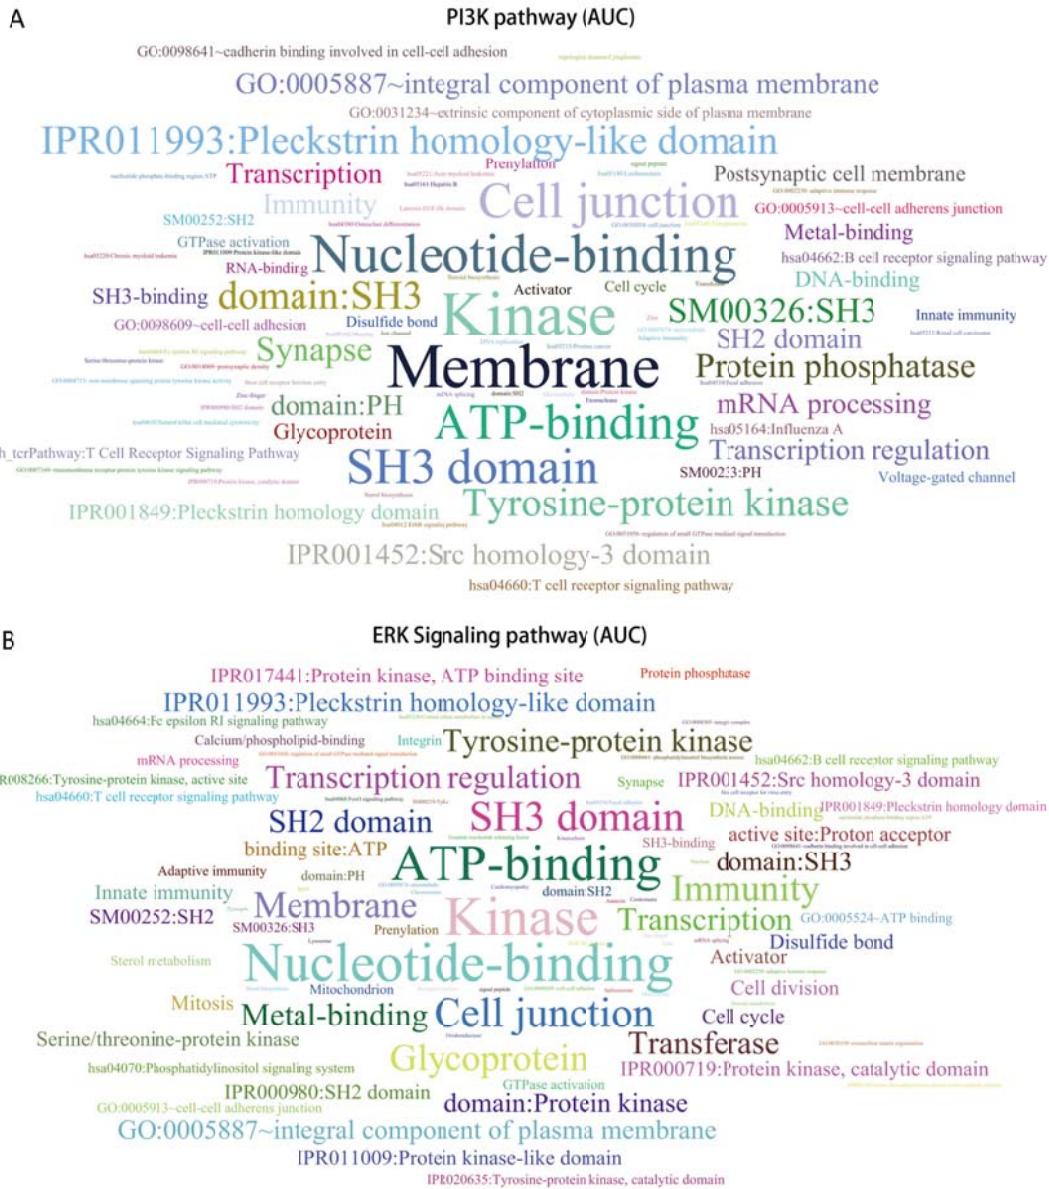

**S6 Figure. Word cloud plot of functional annotations existing in at least 2 drugs in two datasets. (A) for 86 functional annotations in PI3K. (B) for 93 functional annotations in ERK.**

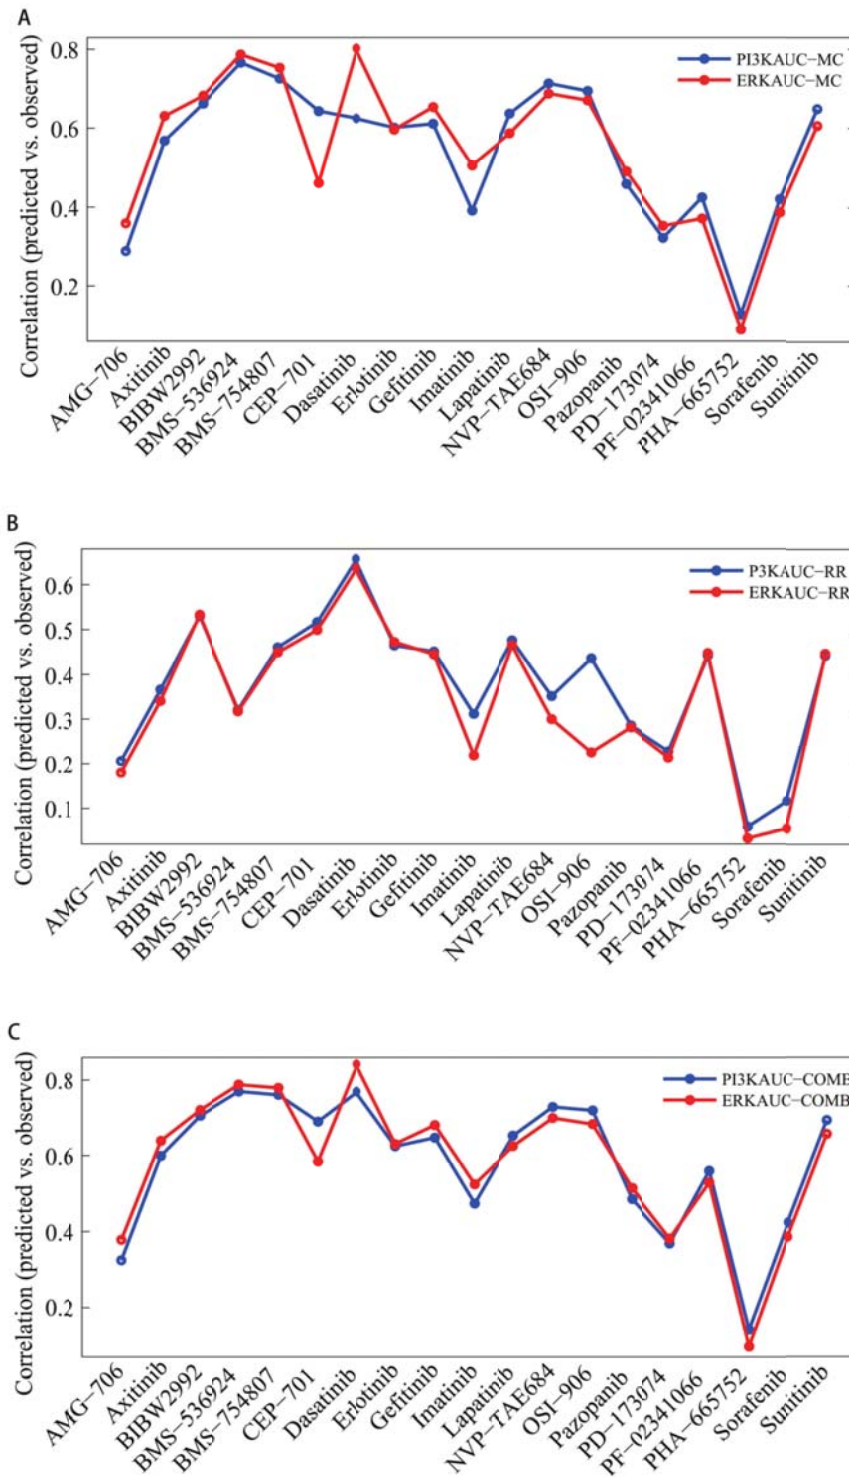

**S7 Figure. Prediction comparisons of 19 common drugs in PI3K and ERK based on three models. (A) Prediction comparison using MC model. (B) Prediction comparison using RR model. (C) Prediction comparison using the combination model.**

**S1 Table. Optimal parameters in MC model**

| Parameter  | CCLE | PI3K | ERK  |
|------------|------|------|------|
| $\theta_1$ | 0.01 | 0.01 | 0.01 |
| $r$        | 6    | 7    | 9    |

**S2 Table (A). Parameters  $\widehat{\sigma}_k$  and the number of key feature genes for 24 drugs in CCLE**

| $k$ | Drugs in CCLE | $\widehat{\sigma}_k$ | minimum number | maximum number |
|-----|---------------|----------------------|----------------|----------------|
| 1   | 17-AAG        | 0.15                 | 571            | 897            |
| 2   | AEW541        | 0.18                 | 472            | 1364           |
| 3   | AZD0530       | 0.15                 | 430            | 902            |
| 4   | AZD6244       | 0.2                  | 487            | 781            |
| 5   | Erlotinib     | 0.2                  | 450            | 816            |
| 6   | Irinotecan    | 0.37                 | 525            | 951            |
| 7   | L-685458      | 0.32                 | 442            | 834            |
| 8   | LBW242        | 0.11                 | 443            | 672            |
| 9   | Lapatinib     | 0.24                 | 452            | 680            |
| 10  | Nilotinib     | 0.26                 | 534            | 1043           |
| 11  | Nutlin-3      | 0.17                 | 416            | 1247           |
| 12  | PD-0325901    | 0.21                 | 451            | 687            |
| 13  | PD-0332991    | 0.3                  | 512            | 1195           |
| 14  | PF2341066     | 0.22                 | 547            | 1355           |
| 15  | PHA-665752    | 0.18                 | 553            | 1484           |
| 16  | PLX4720       | 0.2                  | 451            | 742            |
| 17  | Paclitaxel    | 0.26                 | 459            | 911            |
| 18  | Panobinostat  | 0.37                 | 505            | 770            |
| 19  | RAF265        | 0.18                 | 560            | 1128           |
| 20  | Sorafenib     | 0.25                 | 486            | 861            |
| 21  | TAE684        | 0.2                  | 455            | 1041           |
| 22  | TKI258        | 0.21                 | 503            | 1311           |
| 23  | Topotecan     | 0.32                 | 488            | 870            |
| 24  | ZD-6474       | 0.15                 | 626            | 1183           |

**S2 Table (B). Parameters  $\widehat{\sigma}_k$  and the number of key feature genes for 28 drugs in PI3K**

| $k$ | Drugs in PI3K(AUC) | $\widehat{\sigma}_k$ | minimum number | maximum number |
|-----|--------------------|----------------------|----------------|----------------|
| 1   | A-443654           | 0.12                 | 744            | 1669           |
| 2   | AKT inhibitor VIII | 0.11                 | 644            | 1335           |
| 3   | AMG-706            | 0.1                  | 664            | 1536           |
| 4   | Axitinib           | 0.12                 | 833            | 1665           |
| 5   | BAY 61-3606        | 0.15                 | 762            | 1367           |
| 6   | BIBW2992           | 0.18                 | 857            | 1284           |
| 7   | BMS-536924         | 0.16                 | 753            | 1470           |
| 8   | BMS-754807         | 0.15                 | 608            | 1014           |
| 9   | BX-795             | 0.16                 | 705            | 1239           |
| 10  | CEP-701            | 0.2                  | 600            | 1150           |
| 11  | Dasatinib          | 0.3                  | 668            | 1021           |
| 12  | Erlotinib          | 0.21                 | 682            | 1221           |
| 13  | GDC0941            | 0.11                 | 685            | 1551           |
| 14  | Gefitinib          | 0.13                 | 794            | 1416           |
| 15  | Imatinib           | 0.11                 | 788            | 1823           |
| 16  | JW-7-52-1          | 0.16                 | 810            | 1743           |
| 17  | Lapatinib          | 0.23                 | 690            | 1393           |
| 18  | Midostaurin        | 0.15                 | 807            | 1243           |
| 19  | NVP-TAE684         | 0.13                 | 764            | 1395           |
| 20  | OSI-906            | 0.11                 | 745            | 1591           |
| 21  | Pazopanib          | 0.12                 | 628            | 1273           |
| 22  | PD-173074          | 0.11                 | 711            | 1604           |
| 23  | PF-02341066        | 0.13                 | 639            | 1744           |
| 24  | PHA-665752         | 0.11                 | 604            | 1153           |
| 25  | Rapamycin          | 0.13                 | 766            | 1723           |
| 26  | Sorafenib          | 0.11                 | 641            | 1339           |
| 27  | Sunitinib          | 0.19                 | 666            | 1226           |
| 28  | Temsirolimus       | 0.13                 | 665            | 1088           |



**S2 Table (C). Parameters  $\widehat{\sigma}_k$  and the number of key feature genes for 30 drugs in ERK**

| $k$ | Drugs in ERK(AUC) | $\widehat{\sigma}_k$ | minimum number | maximum number |
|-----|-------------------|----------------------|----------------|----------------|
| 1   | A-770041          | 0.19                 | 623            | 1290           |
| 2   | AMG-706           | 0.1                  | 657            | 1295           |
| 3   | Axitinib          | 0.13                 | 659            | 1261           |
| 4   | AZD-0530          | 0.13                 | 764            | 1900           |
| 5   | BIBW2992          | 0.2                  | 611            | 920            |
| 6   | BMS-536924        | 0.16                 | 677            | 1404           |
| 7   | BMS-754807        | 0.14                 | 788            | 1330           |
| 8   | Bosutinib         | 0.12                 | 834            | 1464           |
| 9   | CEP-701           | 0.2                  | 646            | 1246           |
| 10  | CI-1040           | 0.17                 | 760            | 1253           |
| 11  | Dasatinib         | 0.3                  | 650            | 1052           |
| 12  | Erlotinib         | 0.2                  | 757            | 1500           |
| 13  | FTI-277           | 0.13                 | 636            | 1315           |
| 14  | Gefitinib         | 0.14                 | 687            | 1151           |
| 15  | Imatinib          | 0.1                  | 786            | 2385           |
| 16  | Lapatinib         | 0.22                 | 687            | 1640           |
| 17  | NVP-TAE684        | 0.13                 | 763            | 1300           |
| 18  | OSI-906           | 0.11                 | 805            | 1488           |
| 19  | Pazopanib         | 0.11                 | 781            | 1705           |
| 20  | PD-0325901        | 0.21                 | 653            | 1303           |
| 21  | PD-173074         | 0.11                 | 840            | 1574           |
| 22  | PF-02341066       | 0.13                 | 666            | 1653           |
| 23  | PHA-665752        | 0.1                  | 769            | 1692           |
| 24  | PLX4720           | 0.14                 | 663            | 1109           |
| 25  | RDEA119           | 0.21                 | 684            | 1171           |
| 26  | SB590885          | 0.13                 | 605            | 1132           |
| 27  | Sorafenib         | 0.11                 | 645            | 1205           |
| 28  | Sunitinib         | 0.19                 | 599            | 1227           |
| 29  | Tipifarnib        | 0.1                  | 860            | 1805           |
| 30  | WH-4-023          | 0.22                 | 722            | 1538           |

**S3 Table (A). Optimal parameters in RR and combination models for 24 drugs in CCLE**

| $k$ | Drugs in CCLE   | $\tau_k$    | $\theta_2$   | $\beta_k$ |
|-----|-----------------|-------------|--------------|-----------|
| 1   | 17-AAG          | 0.09        | 1161.6       | 0.33      |
| 2   | AEW541          | 0.19        | 739.2        | 0.59      |
| 3   | AZD0530         | 0.07        | 16830        | 0.71      |
| 4   | AZD6244         | 0.2         | 1458.6       | 0.7       |
| 5   | Erlotinib       | 0.13        | 9152         | 0.66      |
| 6   | Irinotecan      | 0.33        | 517          | 0.71      |
| 7   | L-685458        | 0.23        | 15730        | 0.61      |
| 8   | LBW242          | 0.02        | 8.64E-07     | 0.6       |
| 9   | Lapatinib       | 0.24        | 1814.4       | 0.46      |
| 10  | Nilotinib       | 0.17        | 6072         | 0.52      |
| 11  | <b>Nutlin-3</b> | <b>0.15</b> | <b>12342</b> | <b>1</b>  |
| 12  | PD-0325901      | 0.23        | 950.4        | 0.64      |
| 13  | PD-0332991      | 0.29        | 6336         | 0.74      |
| 14  | PF2341066       | 0.18        | 6864         | 0.73      |
| 15  | PHA-665752      | 0.09        | 20790        | 0.69      |
| 16  | PLX4720         | 0.13        | 1612.8       | 0.46      |
| 17  | Paclitaxel      | 0.2         | 165          | 0.47      |
| 18  | Panobinostat    | 0.29        | 1320         | 0.4       |
| 19  | RAF265          | 0.1         | 2730         | 0.57      |
| 20  | Sorafenib       | 0.23        | 5060         | 0.6       |
| 21  | TAE684          | 0.16        | 2310         | 0.67      |
| 22  | TKI258          | 0.12        | 7700         | 0.65      |
| 23  | Topotecan       | 0.33        | 214.2        | 0.53      |
| 24  | ZD-6474         | 0.08        | 6204         | 0.68      |

**S3 Table (B). Optimal parameters in RR and combination models for 28 drugs in PI3K**

| $k$ | Drugs in PI3K(AUC) | $\tau_k$ | $\theta_2$ | $\beta_k$ |
|-----|--------------------|----------|------------|-----------|
| 1   | A-443654           | 0.03     | 27720      | 0.93      |
| 2   | AKT inhibitor VIII | 0.05     | 5.64E-07   | 0.42      |
| 3   | AMG-706            | 0.13     | 4950       | 0.35      |
| 4   | Axitinib           | 0.1      | 739.2      | 0.59      |
| 5   | BAY 61-3606        | 0.09     | 16940      | 0.36      |
| 6   | BIBW2992           | 0.1      | 8800       | 0.52      |
| 7   | BMS-536924         | 0.13     | 5940       | 0.79      |
| 8   | BMS-754807         | 0.13     | 1100       | 0.59      |
| 9   | BX-795             | 0.14     | 4950       | 0.68      |
| 10  | CEP-701            | 0.16     | 2016       | 0.53      |
| 11  | Dasatinib          | 0.27     | 4950       | 0.37      |
| 12  | Erlotinib          | 0.14     | 7392       | 0.55      |
| 13  | GDC0941            | 0.07     | 4950       | 0.58      |
| 14  | Gefitinib          | 0.04     | 9900       | 0.53      |
| 15  | Imatinib           | 0.02     | 945        | 0.43      |
| 16  | JW-7-52-1          | 0.15     | 7854       | 0.67      |
| 17  | Lapatinib          | 0.21     | 11858      | 0.57      |
| 18  | Midostaurin        | 0.08     | 7546       | 0.41      |
| 19  | NVP-TAE684         | 0.16     | 1134       | 0.67      |
| 20  | OSI-906            | 0.06     | 2142       | 0.61      |
| 21  | Pazopanib          | 0.1      | 10098      | 0.48      |
| 22  | PD-173074          | 0.06     | 6732       | 0.38      |
| 23  | PF-02341066        | 0.12     | 2356.2     | 0.31      |
| 24  | PHA-665752         | 0.05     | 107800     | 0.22      |
| 25  | Rapamycin          | 0.08     | 10780      | 0.71      |
| 26  | Sorafenib          | 0.09     | 13464      | 0.7       |
| 27  | Sunitinib          | 0.16     | 1965.6     | 0.56      |
| 28  | Temsirolimus       | 0.1      | 4950       | 0.37      |

**S3 Table (C). Optimal parameters in RR and combination models for 30 drugs in ERK**

| $k$ | Drugs in ERK(AUC) | $\tau_k$ | $\theta_2$ | $\beta_k$ |
|-----|-------------------|----------|------------|-----------|
| 1   | A-770041          | 0.2      | 1650       | 0.95      |
| 2   | AMG-706           | 0.13     | 4950       | 0.36      |
| 3   | Axitinib          | 0.07     | 279        | 0.67      |
| 4   | AZD-0530          | 0.16     | 594        | 0.94      |
| 5   | BIBW2992          | 0.16     | 4950       | 0.54      |
| 6   | BMS-536924        | 0.17     | 2217.6     | 0.86      |
| 7   | BMS-754807        | 0.11     | 1544.4     | 0.58      |
| 8   | Bosutinib         | 0.12     | 2058       | 0.67      |
| 9   | CEP-701           | 0.16     | 1528.8     | 0.34      |
| 10  | CI-1040           | 0.14     | 4950       | 0.8       |
| 11  | Dasatinib         | 0.27     | 4950       | 0.58      |
| 12  | Erlotinib         | 0.13     | 7546       | 0.5       |
| 13  | FTI-277           | 0.04     | 181500     | 0.18      |
| 14  | Gefitinib         | 0.05     | 11858      | 0.56      |
| 15  | Imatinib          | 0.01     | 45         | 0.48      |
| 16  | Lapatinib         | 0.21     | 10560      | 0.48      |
| 17  | NVP-TAE684        | 0.15     | 1310.4     | 0.76      |
| 18  | OSI-906           | 0.07     | 2142       | 0.3       |
| 19  | Pazopanib         | 0.09     | 7546       | 0.53      |
| 20  | PD-0325901        | 0.21     | 1558.2     | 0.85      |
| 21  | PD-173074         | 0.06     | 7854       | 0.36      |
| 22  | PF-02341066       | 0.13     | 2184       | 0.27      |
| 23  | PHA-665752        | 0.05     | 102960     | 0.36      |
| 24  | PLX4720           | 0.15     | 1650       | 0.47      |
| 25  | RDEA119           | 0.2      | 1401.4     | 0.61      |
| 26  | SB590885          | 0.16     | 4950       | 0.6       |
| 27  | Sorafenib         | 0.04     | 49500      | 0.8       |
| 28  | Sunitinib         | 0.15     | 2142       | 0.5       |
| 29  | Tipifarnib        | 0.01     | 12826      | 0.36      |

---

|    |          |     |      |      |
|----|----------|-----|------|------|
| 30 | WH-4-023 | 0.2 | 4950 | 0.67 |
|----|----------|-----|------|------|

---

**S4 Table. Prediction performance of MC model in two datasets**

---

| Dataset | $\geq$ CSN (%) | $\geq$ DSN (%) | $\geq$ Integrated (%) |
|---------|----------------|----------------|-----------------------|
| PI3K    | 89             | 96             | 71                    |
| ERK     | 93             | 90             | 80                    |

---

**S5 Table. Prediction performance of RR model in two datasets**

---

| Dataset | $\geq$ CSN (%) | $\geq$ DSN (%) | $\geq$ Integrated (%) |
|---------|----------------|----------------|-----------------------|
| PI3K    | 71             | 46             | 4                     |
| ERK     | 40             | 47             | 0                     |

---
